# Supplementary material for: BX795-Organic Acid Coevaporates: Evaluation of Solid-State Characteristics, In Vitro Cytocompatibility and In Vitro Activity against HSV-1 and HSV-2
Source: MDPI journal article supplement (doi:10.3390/pharmaceutics13111920), 2021-11-12
Supplement: s1 [file s1]

# Supplementary Materials: BX795-organic Acid Coevaporates: Evaluation of Solid-State Characteristics, In Vitro Cytocompatibility and In Vitro Activity Against HSV-1 and HSV-2

Yogesh Sutar, Tejabhram Yadavalli, Sagar Paul, Sudipta Mallick, Raghuram Koganti, Harsh Chauhan, Abhijit A. Date, Deepak Shukla

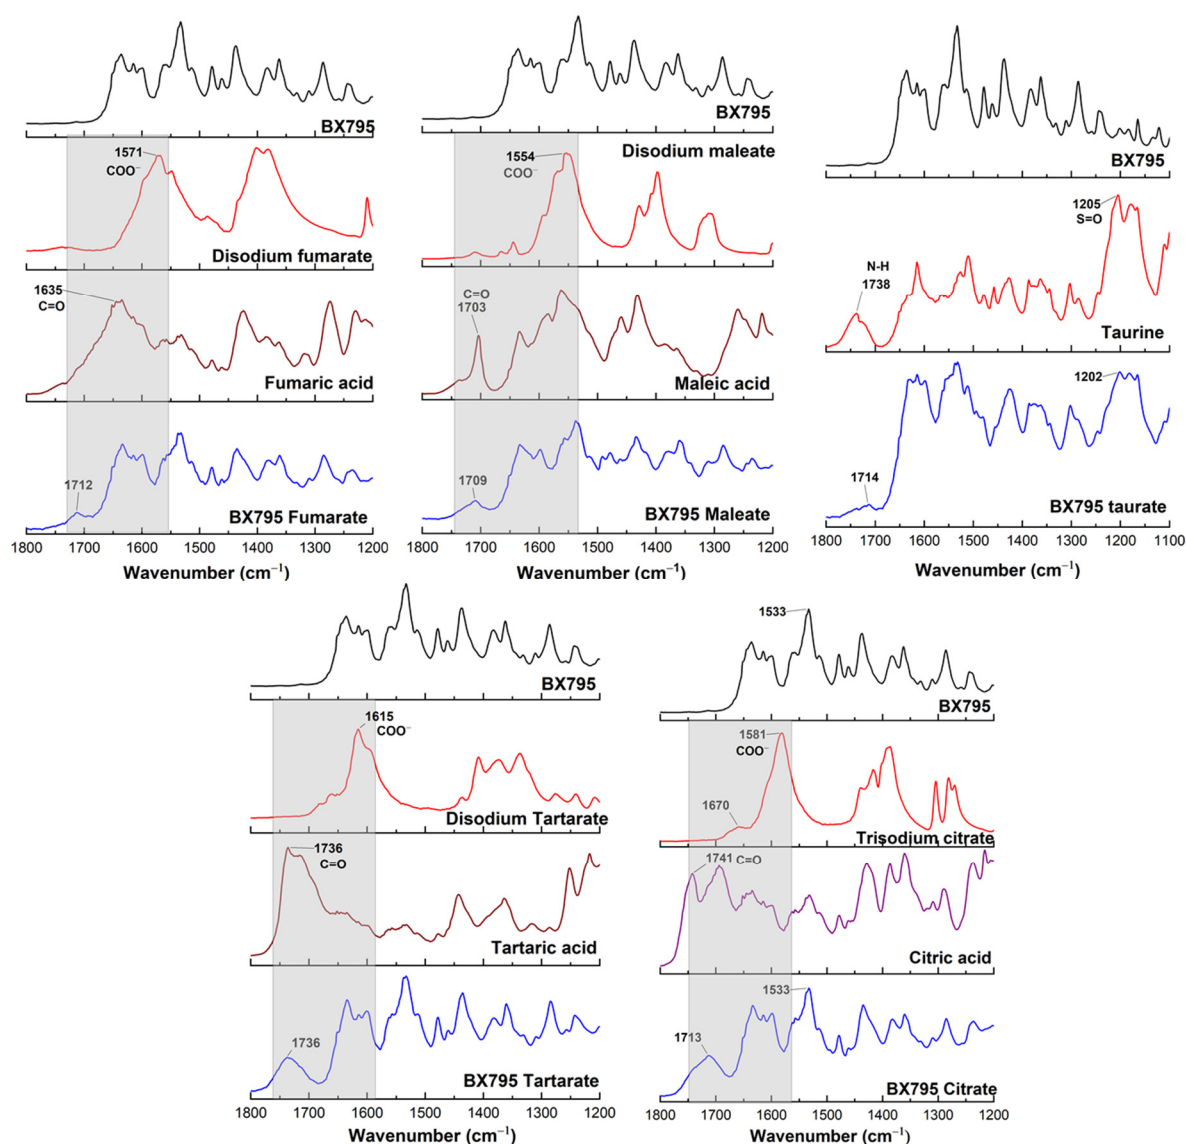

Figure S1. FTIR spectra of BX795, pure organic acids, salts of organic acids, and BX795-organic acid coevaporates.

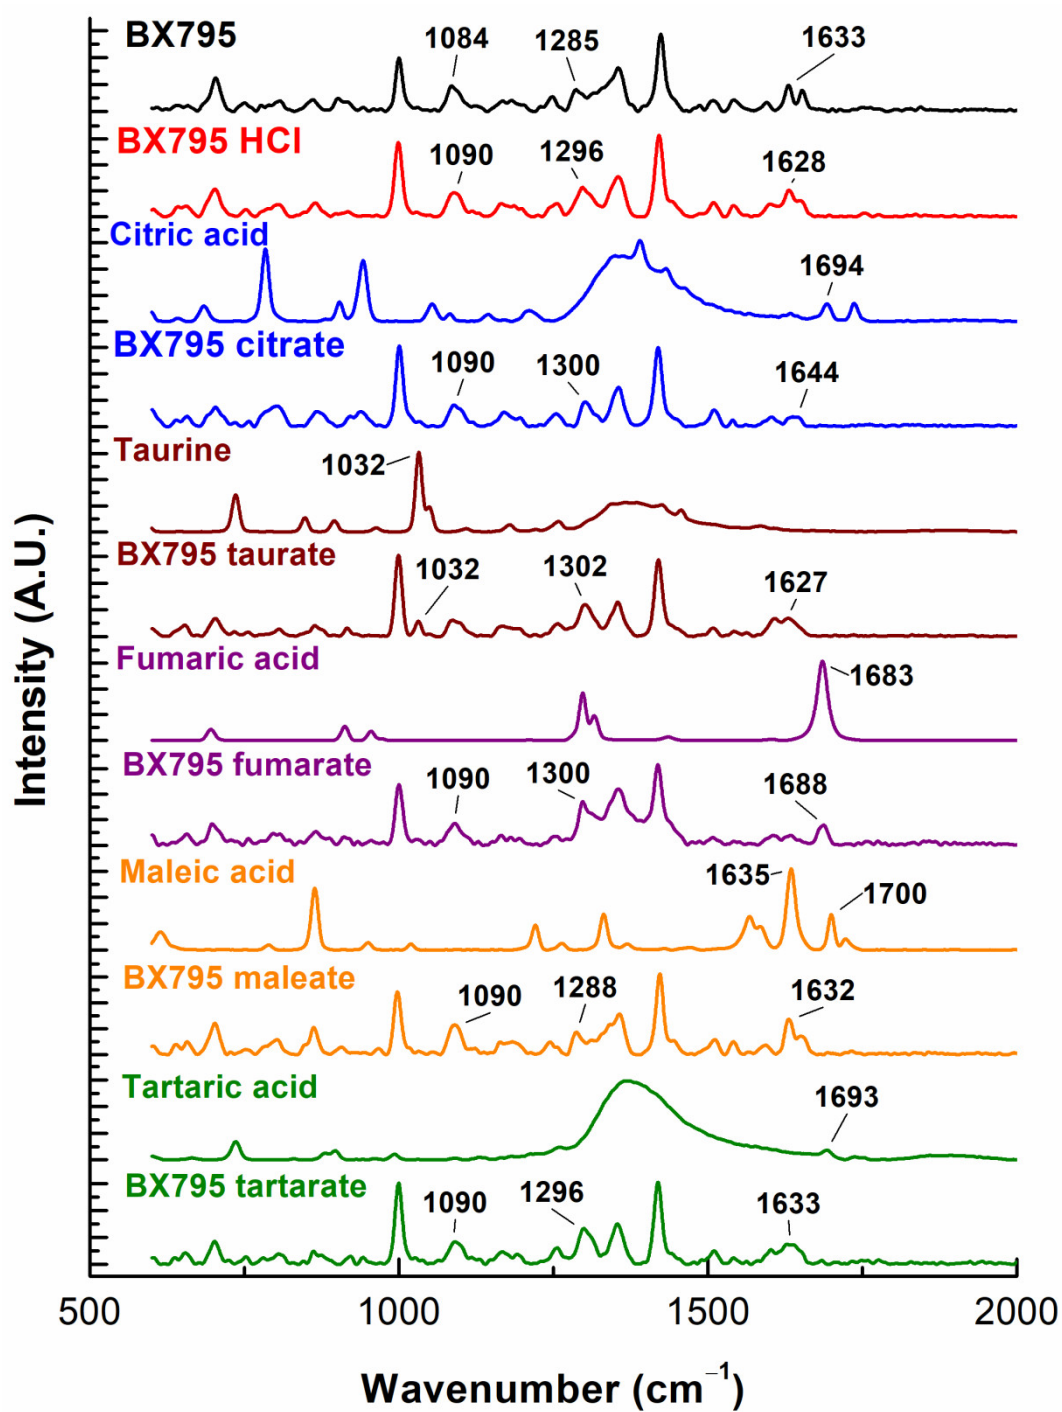

**Figure S2.** The Raman spectra of BX795, pure organic acids, and BX795-organic acid coevaporates. The Raman spectra confirm the interaction between BX795 and organic acids.



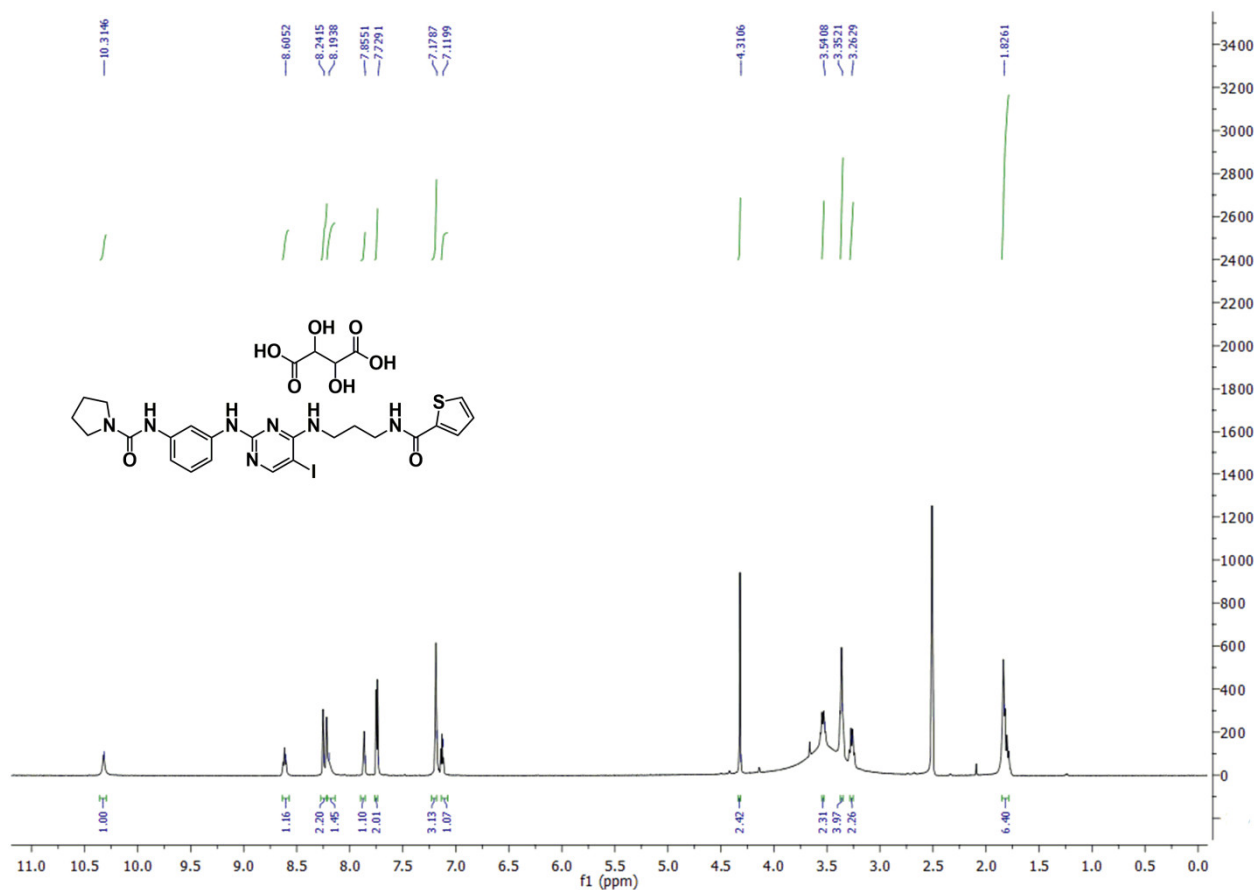

Figure S5. <sup>1</sup>H NMR Spectrum of BX795 tartarate.

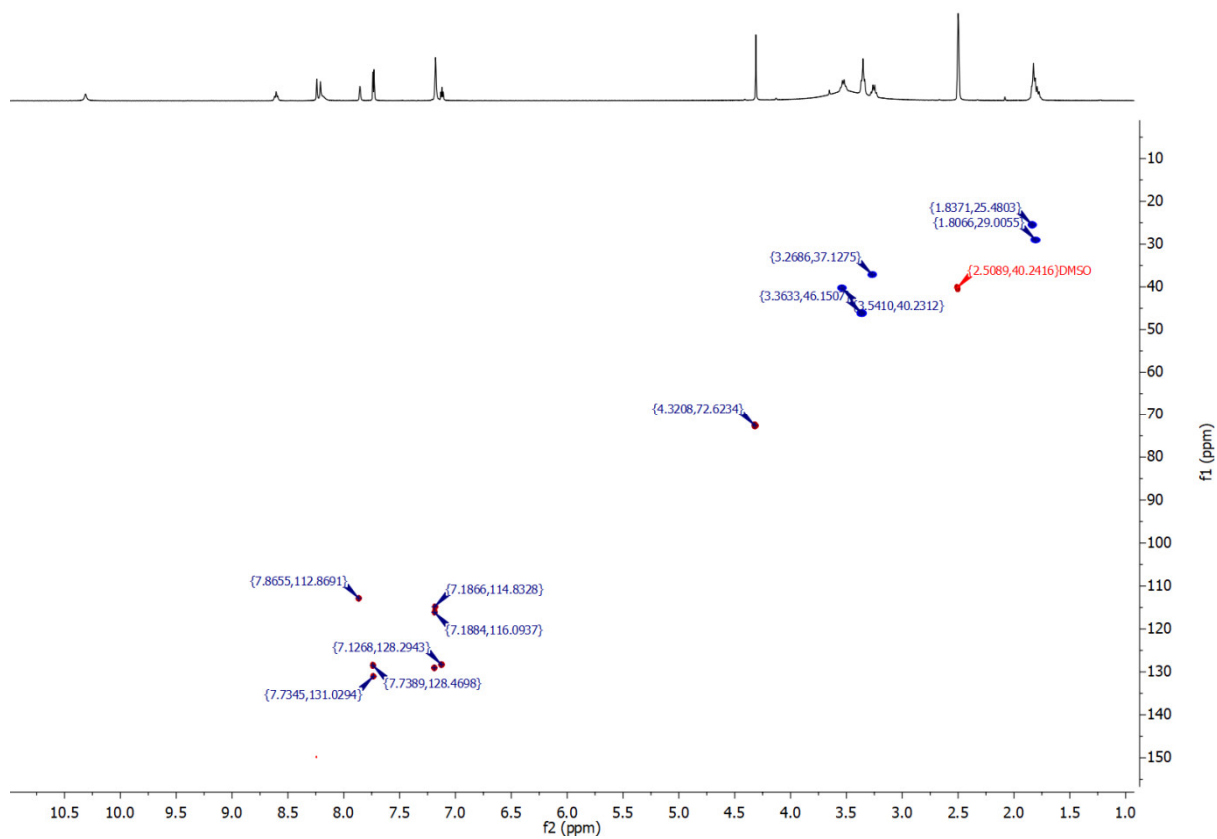

Figure S6. HSQC NMR Spectrum of BX795 tartarate.

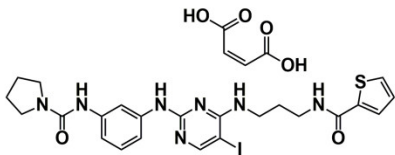

**Figure S8.** HSQC NMR Spectrum of BX795 maleate.

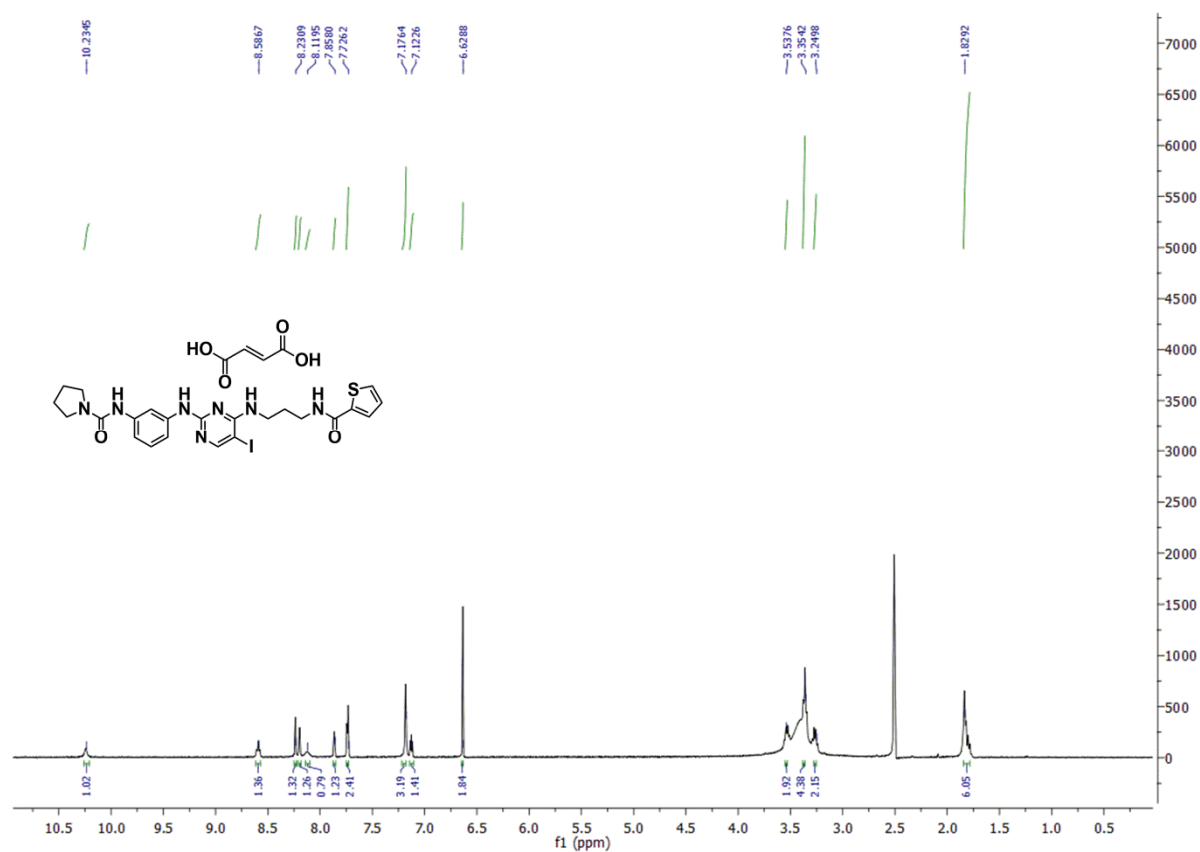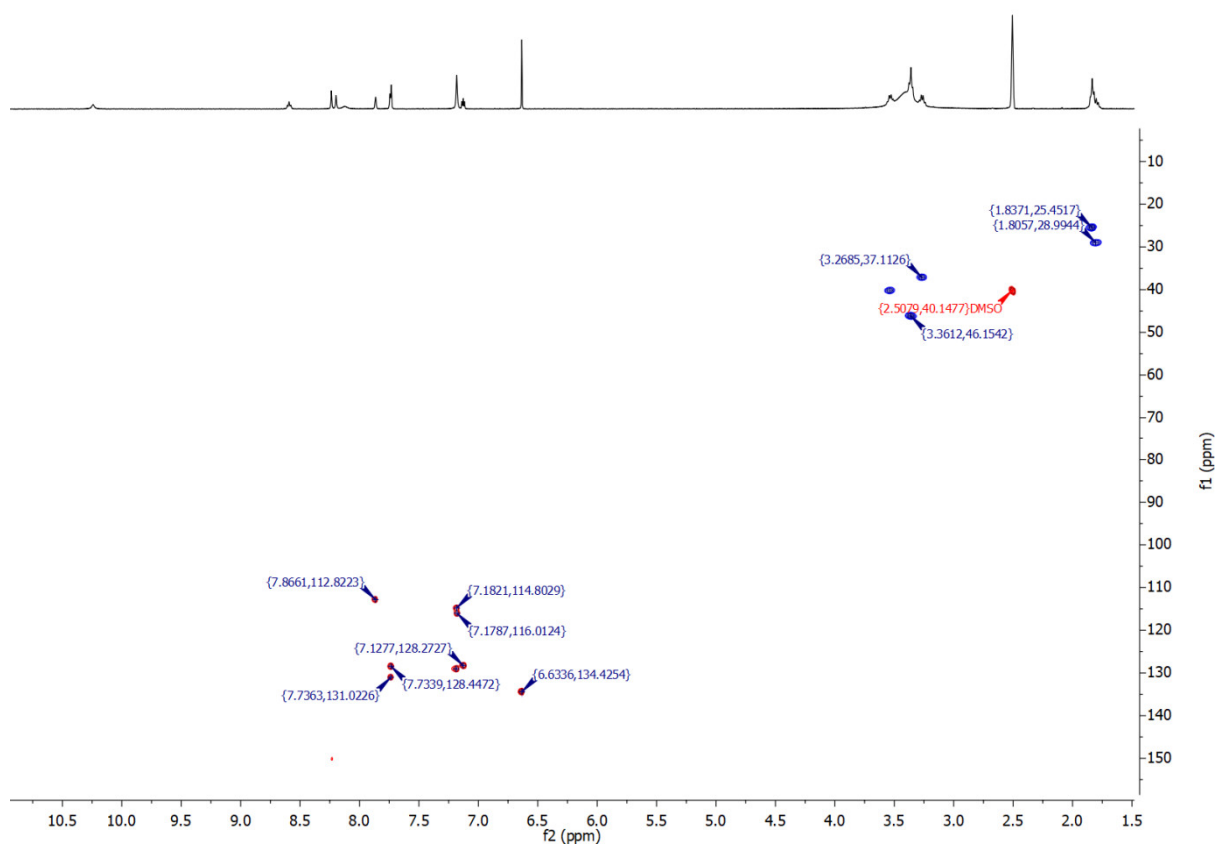

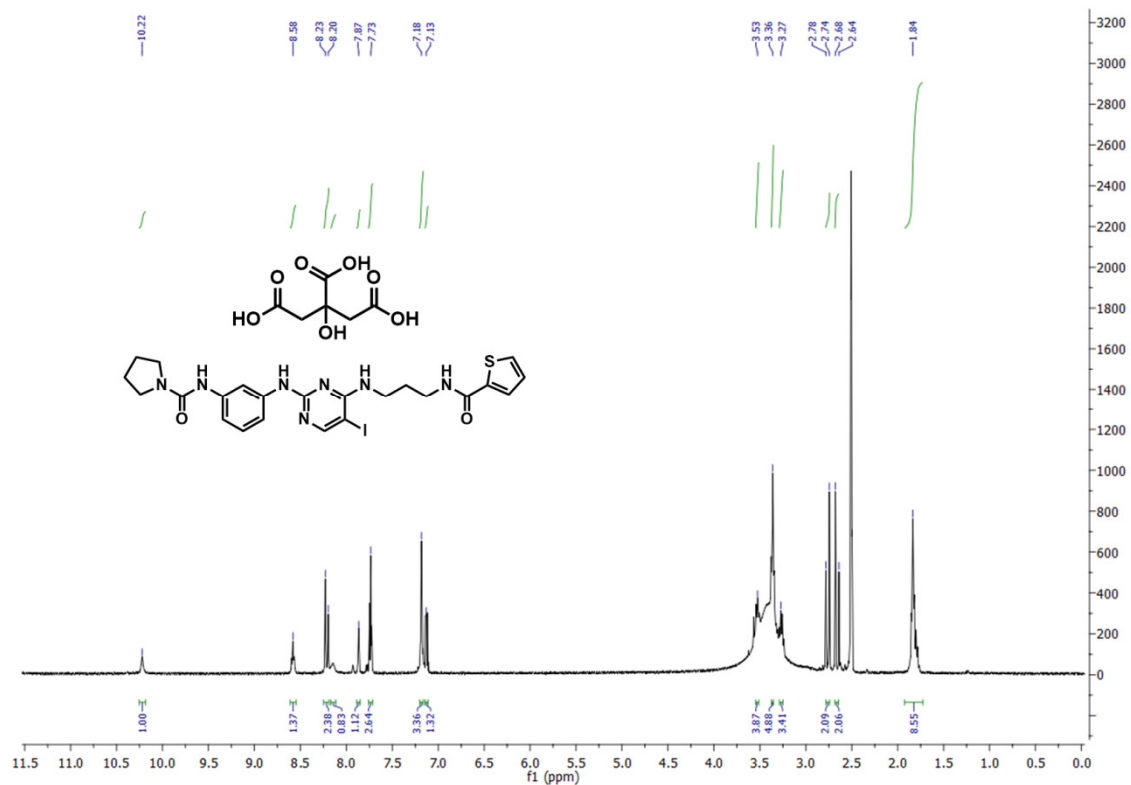

Figure S11. <sup>1</sup>H NMR Spectrum of BX795 citrate.

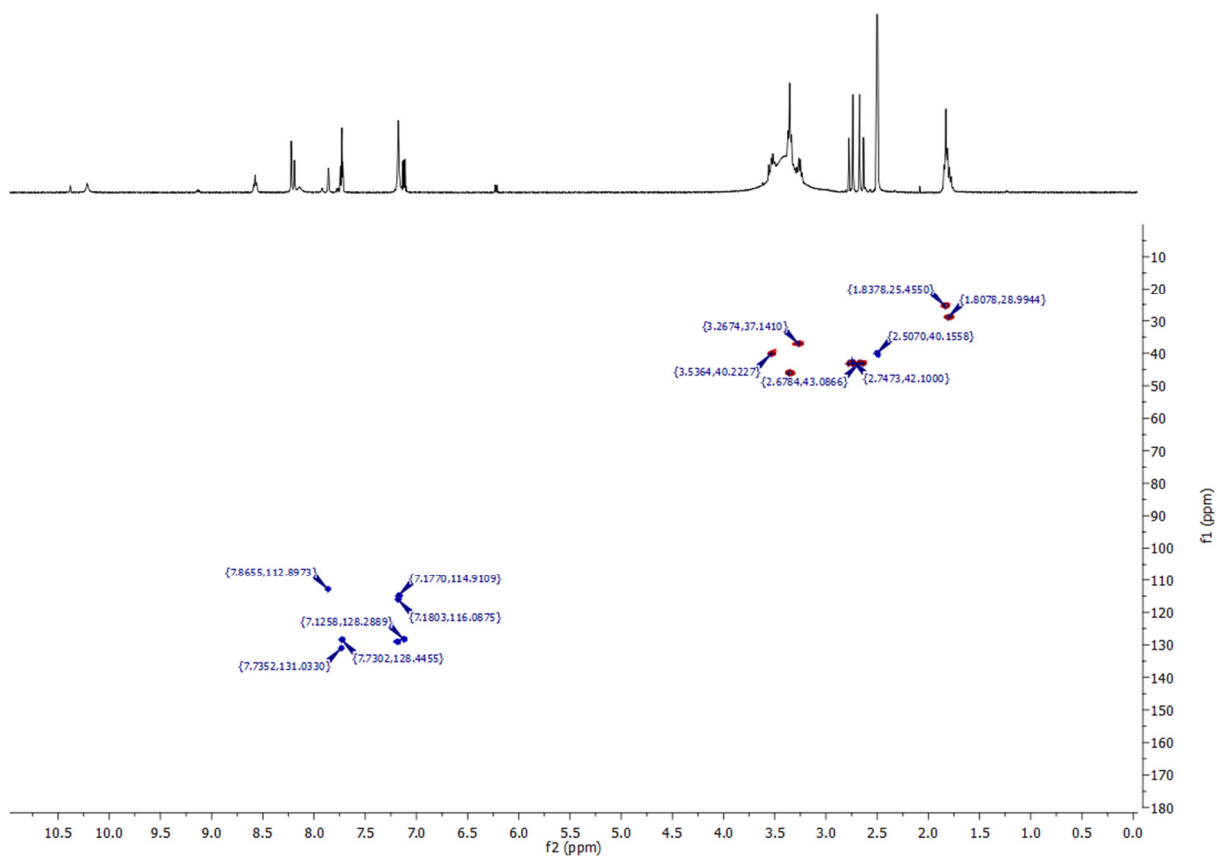

Figure S12. HSQC NMR Spectrum of BX795 citrate.

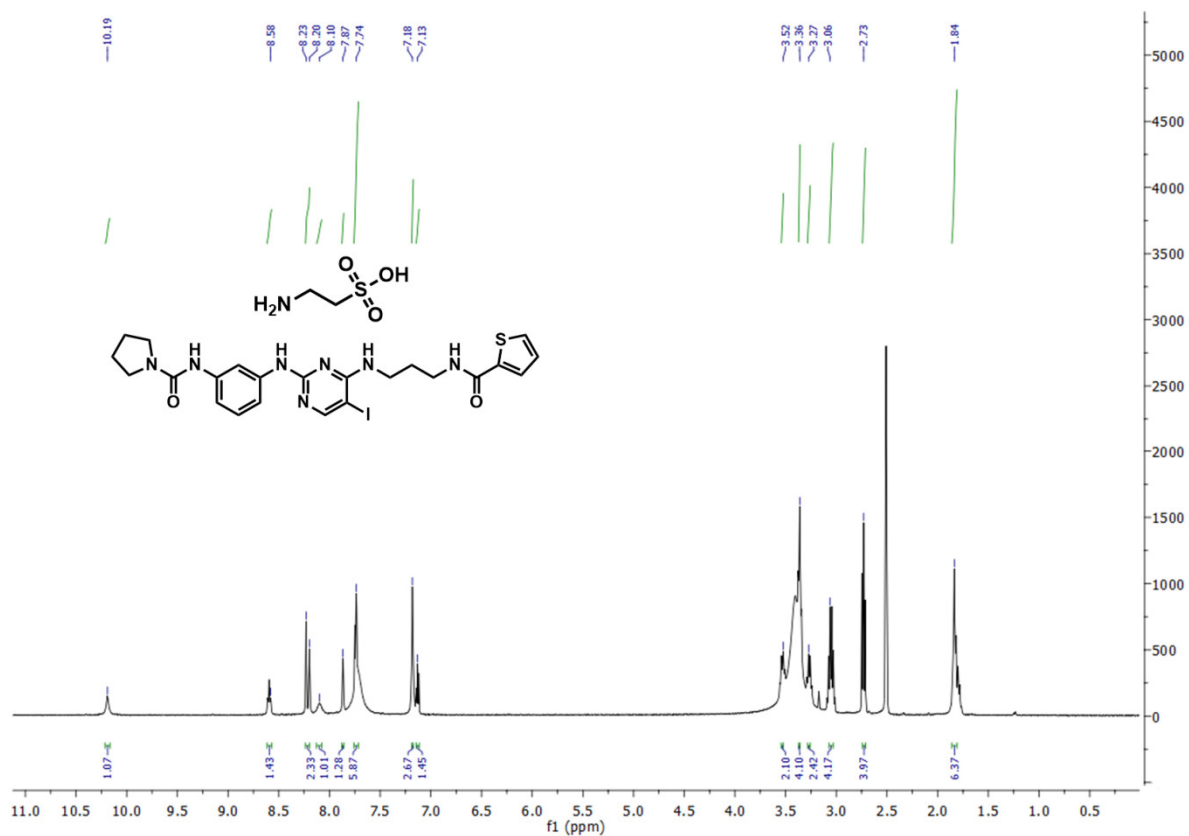

Figure S13. <sup>1</sup>H NMR Spectrum of BX795 taurate.

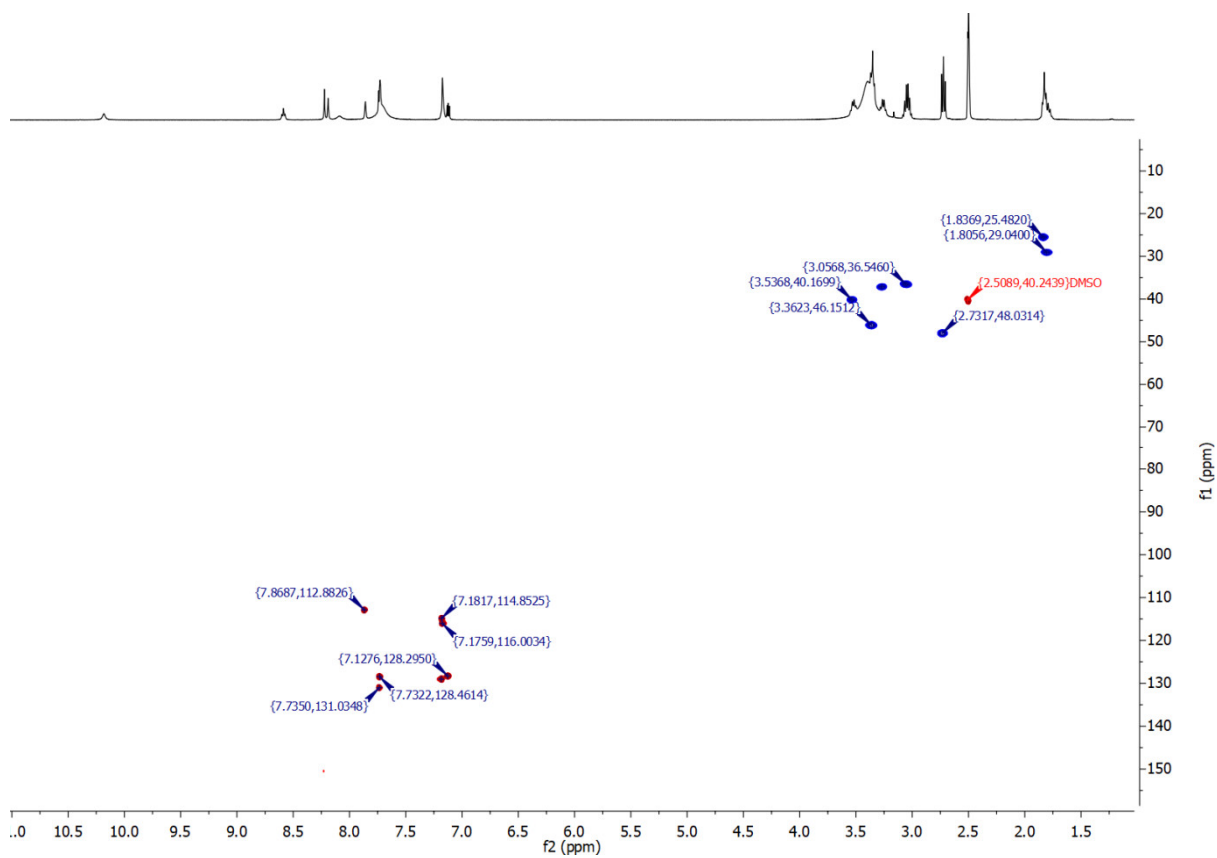

Figure S14. HSQC NMR Spectrum of BX795 taurate.



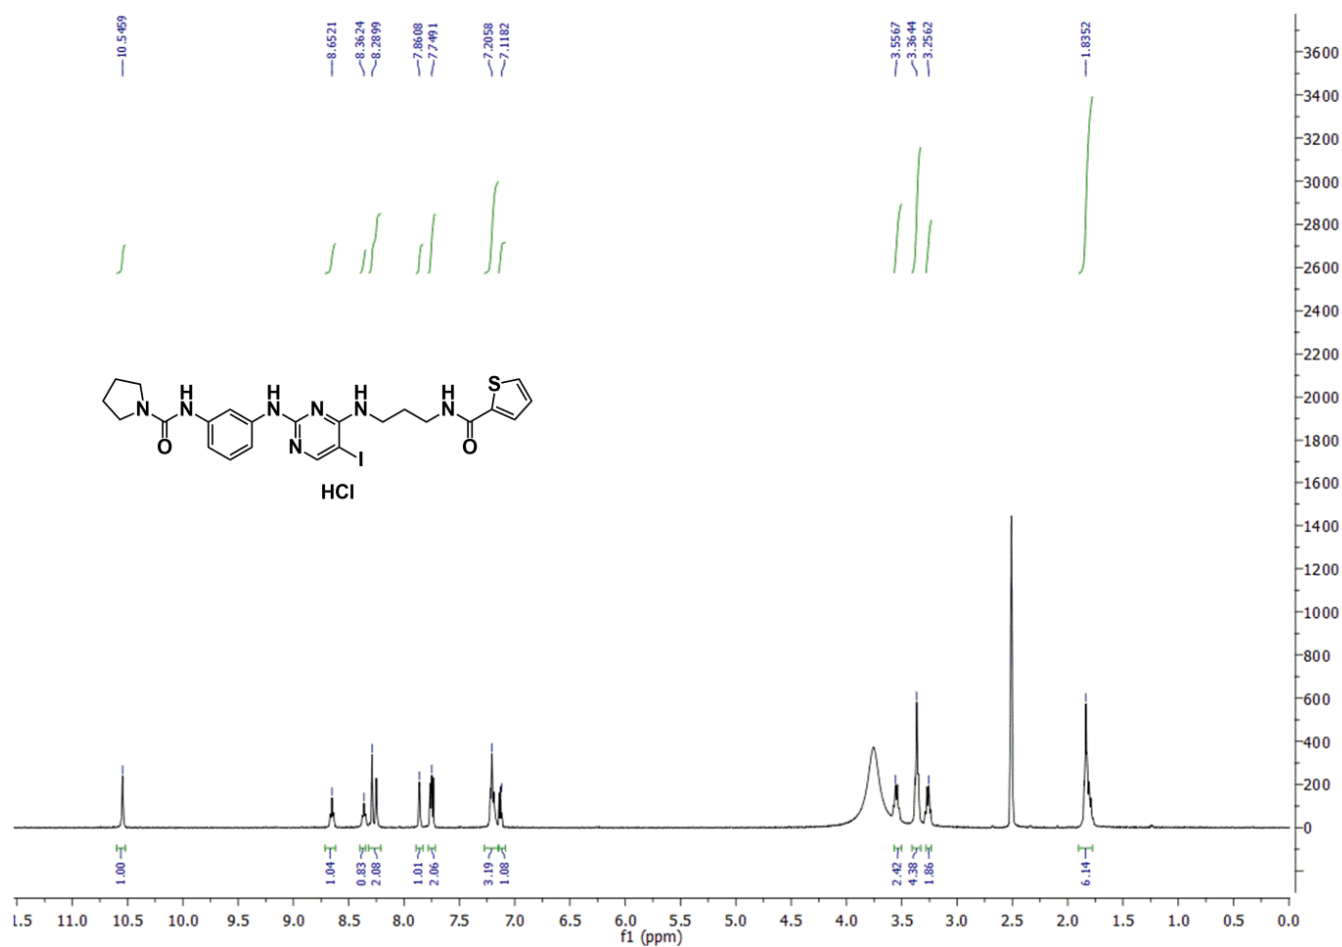

Figure S15. <sup>1</sup>H NMR Spectrum of BX795 hydrochloride.

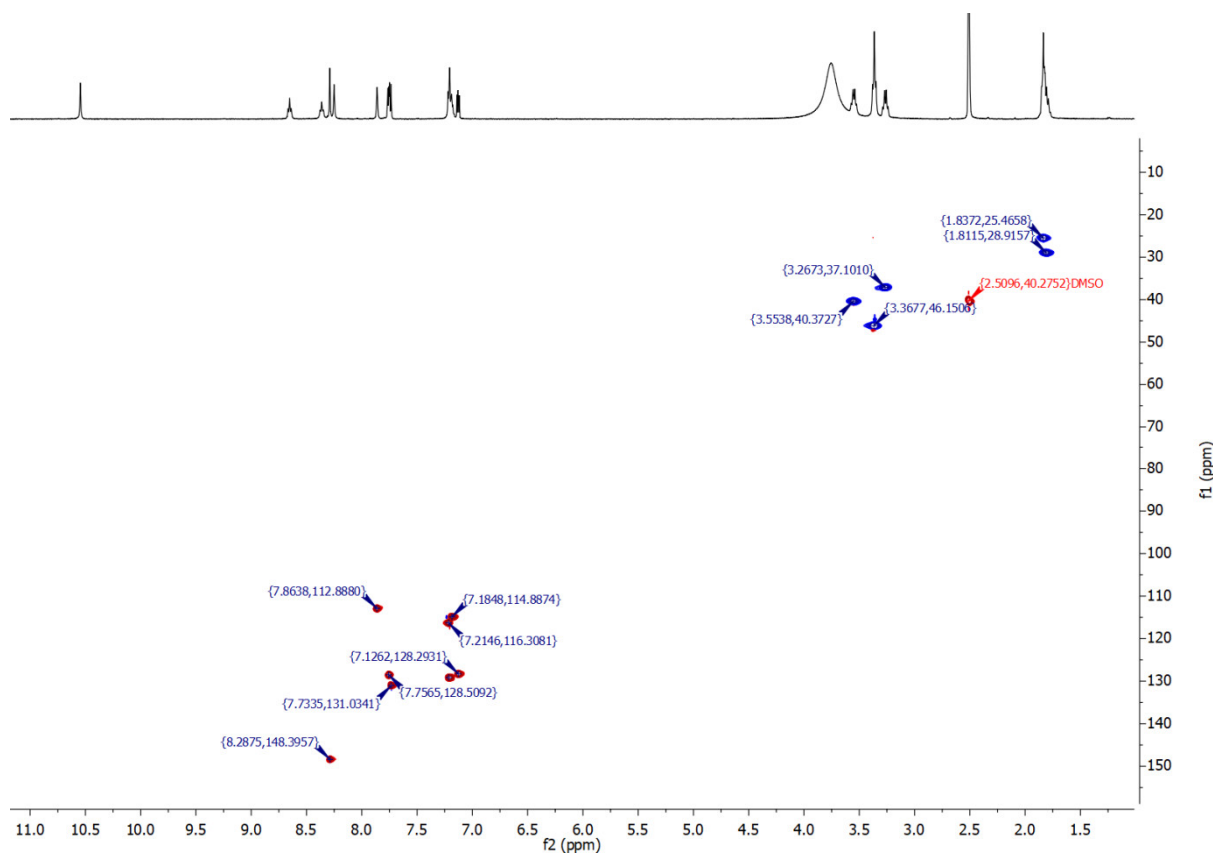

Figure S16. HSQC NMR Spectrum of BX795 hydrochloride.

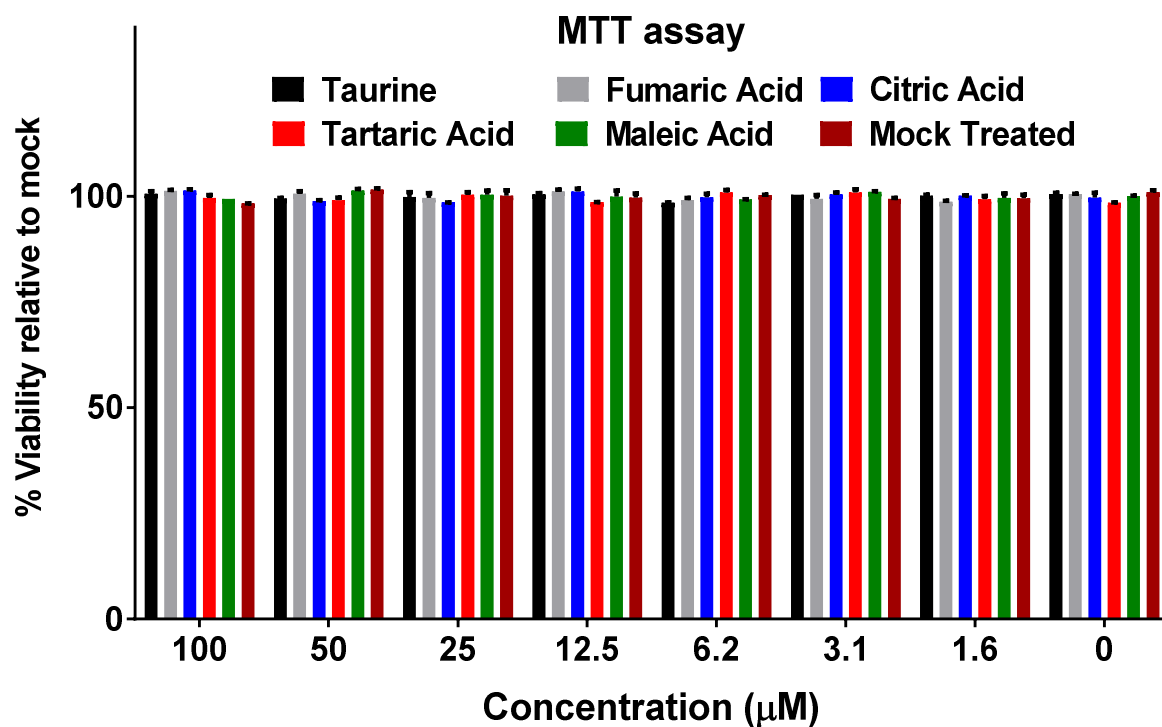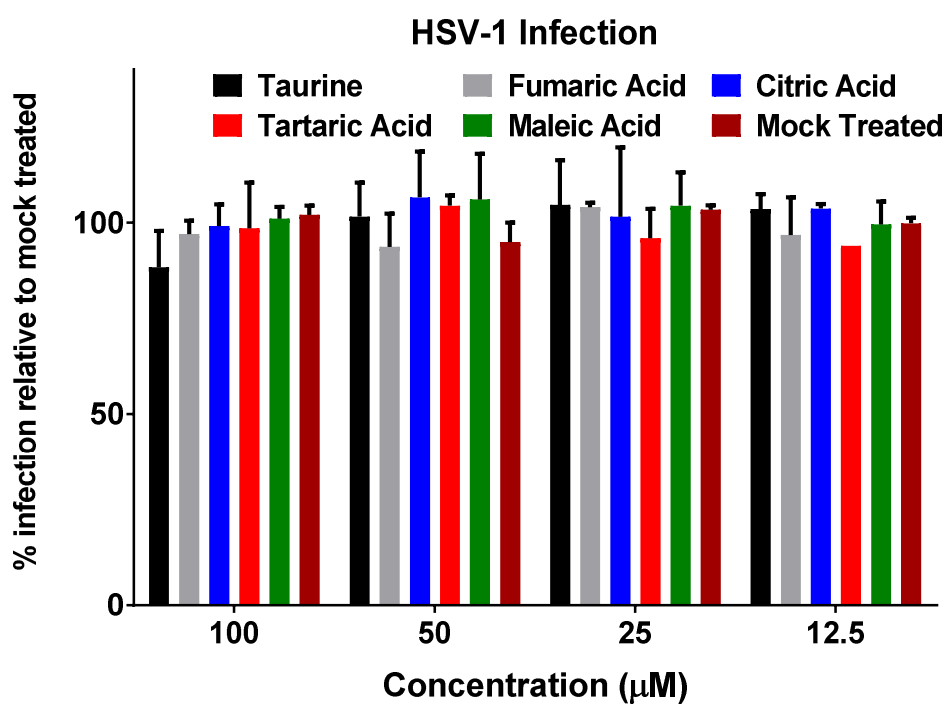

**Figure S17.** Organic acids used for the preparation of BX795-organic acid coevaporates did not show any cytotoxicity and antiviral activity at concentrations equivalent to those used for the in vitro biological activity testing of the BX795-organic acid coevaporates.

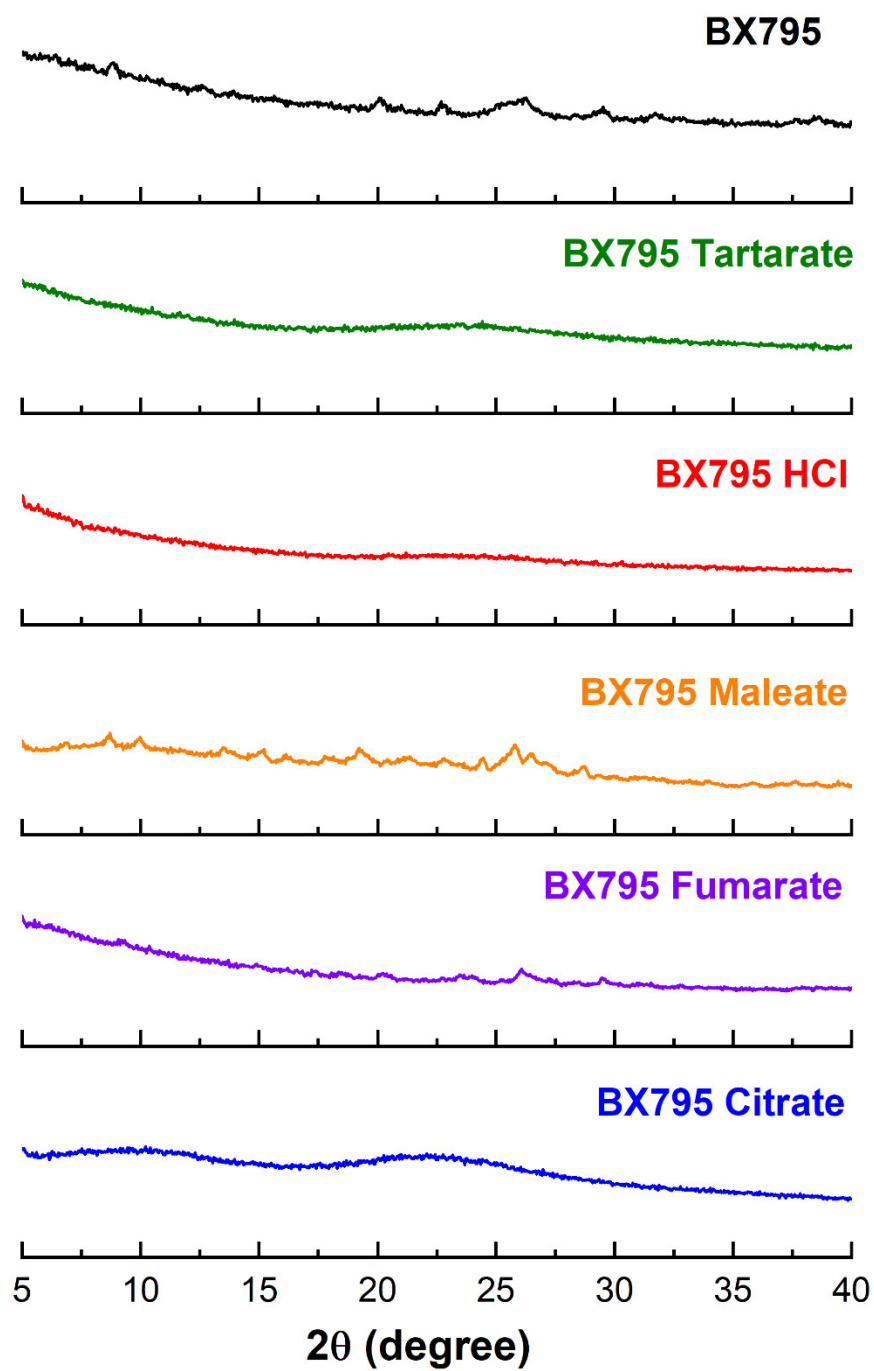

**Figure S18.** PXRD profile of BX795 and BX795-organic acid coevaporates after 1-month of storage at room temperature.
